# Supplementary material
Source: MDPI journal article supplement (https://www.mdpi.com/2071-1050/9/2/232)
Supplement: s1 [file s1]

Supplementary Materials: Exploring the Use of Unprocessed Waste Chicken Eggshells for
UV-Protective Applications

Daphne Fecheyr-Lippens, Asritha Nallapaneni and Matthew D. Shawkey

**Table S1.** One-way ANOVA and Tukey multiple comparison tests (α = 0.05) for UV degradation of polystyrene (*n* = 3).

| **Samples** | **UV Degradation 1** | **95% C.I.** | ***p*2** |
| --- | --- | --- | --- |
| Control-Brown | 11.42 | [8.99, 13.84] | <0.001 |
| Quartz-Brown | 2.71 | [0.28, 5.13] | 0.03 |
| White-Brown | 0.19 | [−2.23, 2.61] | 1.00 |
| Quartz-Control | −8.71 | [−11.13, −6.29] | <0.001 |
| White-Control | −11.23 | [−13.65, −8.80] | <0.001 |
| White-Quartz | −2.52 | [−4.94, −0.09] | 0.04 |

1 Difference in degree of UV degradation; 2 *p*-values were adjusted following Thukey HSD’s method.

**Table S2.** One-way ANOVA and Tukey multiple comparison tests (α = 0.05) for UV degradation of nylon (*n* = 6).

| **Samples** | **UV Degradation 1** | **95% C.I.** | ***p*2** |
| --- | --- | --- | --- |
| Quartz-Brown | 2.75 | [2.49, 3.02] | <0.001 |
| TiO2-Brown | 0.69 | [0.43, 0.95] | <0.001 |
| White-Brown | 0.11 | [−0.15, 0.73] | 0.62 |
| TiO2-Quartz | −2.06 | [−2.32, −1.80] | <0.001 |
| White-Quartz | −2.64 | [−2.90, −2.38] | <0.001 |
| White-TiO2 | −0.58 | [−0.84, −0.32] | <0.001 |

1 Difference in degree of UV degradation; 2 *p*-values were adjusted following Thukey HSD’s method.


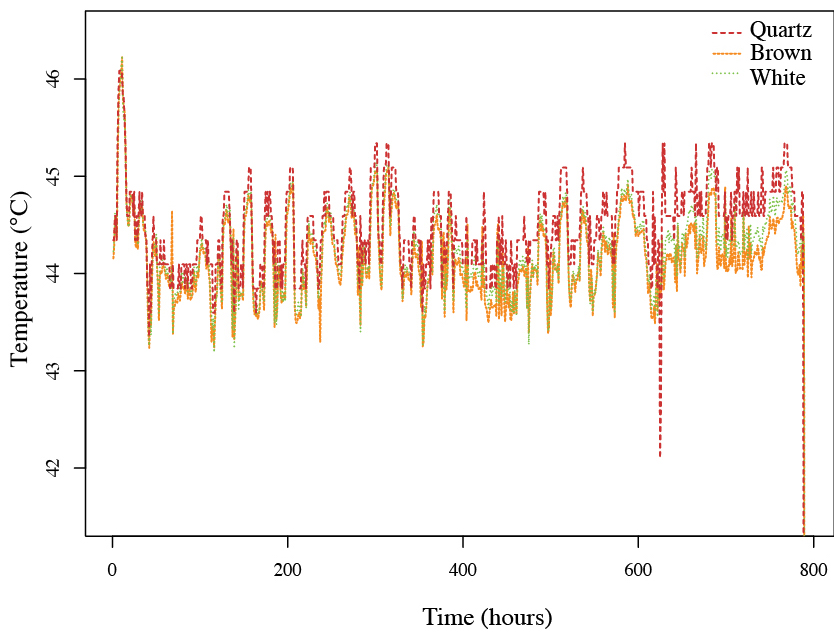


**Figure S1.** Temperature measured underneath a white and a brown chicken eggshell, and the quartz coverslips.


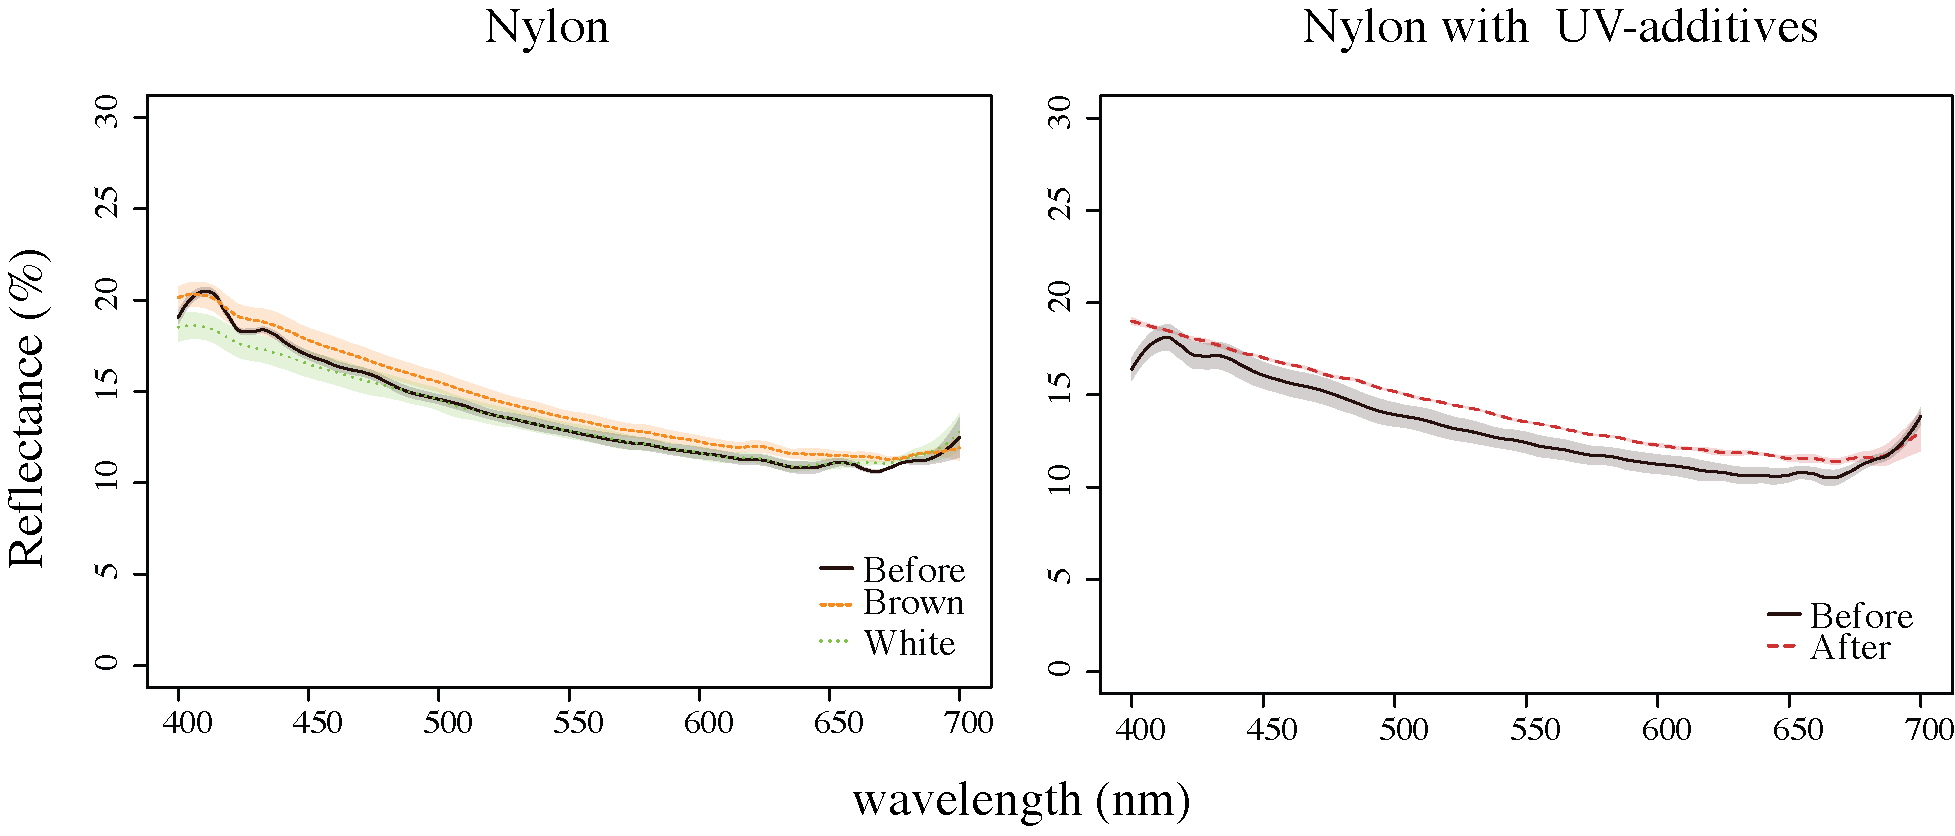


**Figure S2.** Diffuse reflectance spectra showing no changes of optical properties of nylon after 800 h UV exposure. Plotted lines are group mean spectra (*n* = 3) with shaded areas representing the standard error.


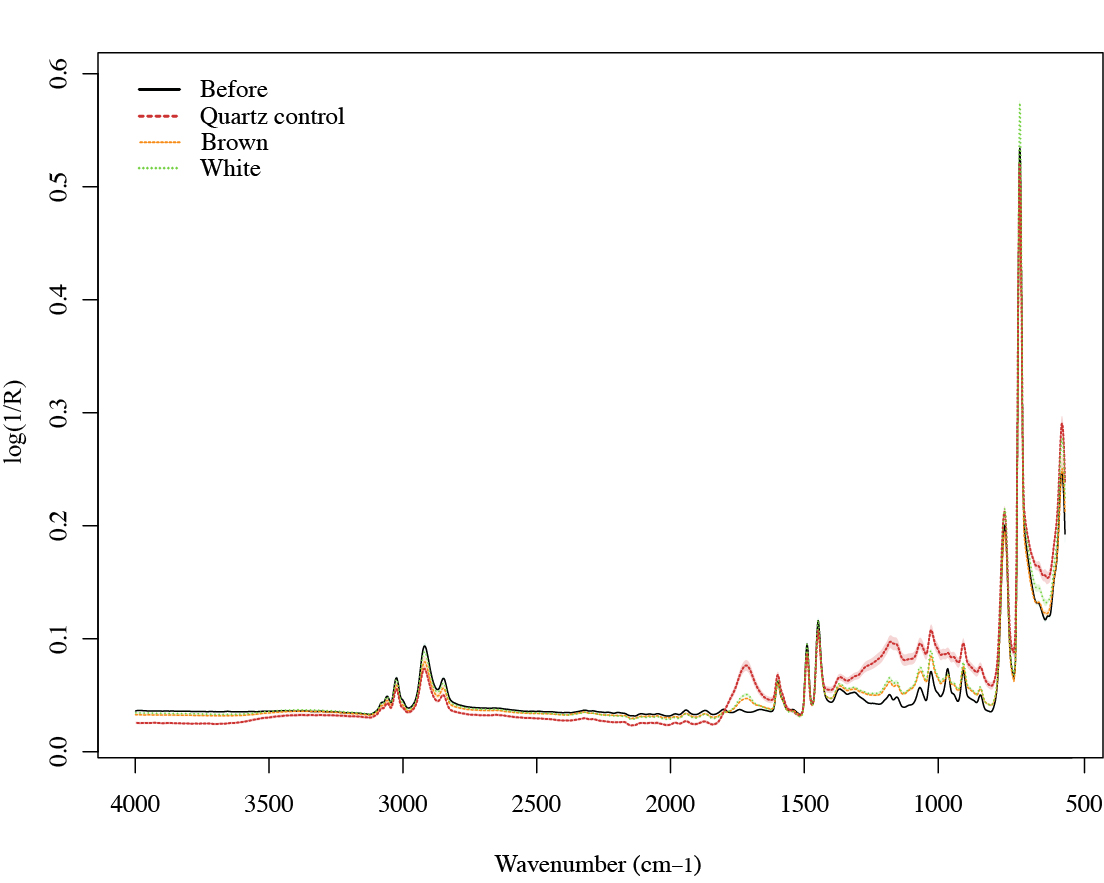


**Figure S3.** Full FTIR spectra of polystyrene before and after 800 h of UV exposure. Plotted lines are group mean spectra (*n* = 3) with shaded areas representing the standard error.


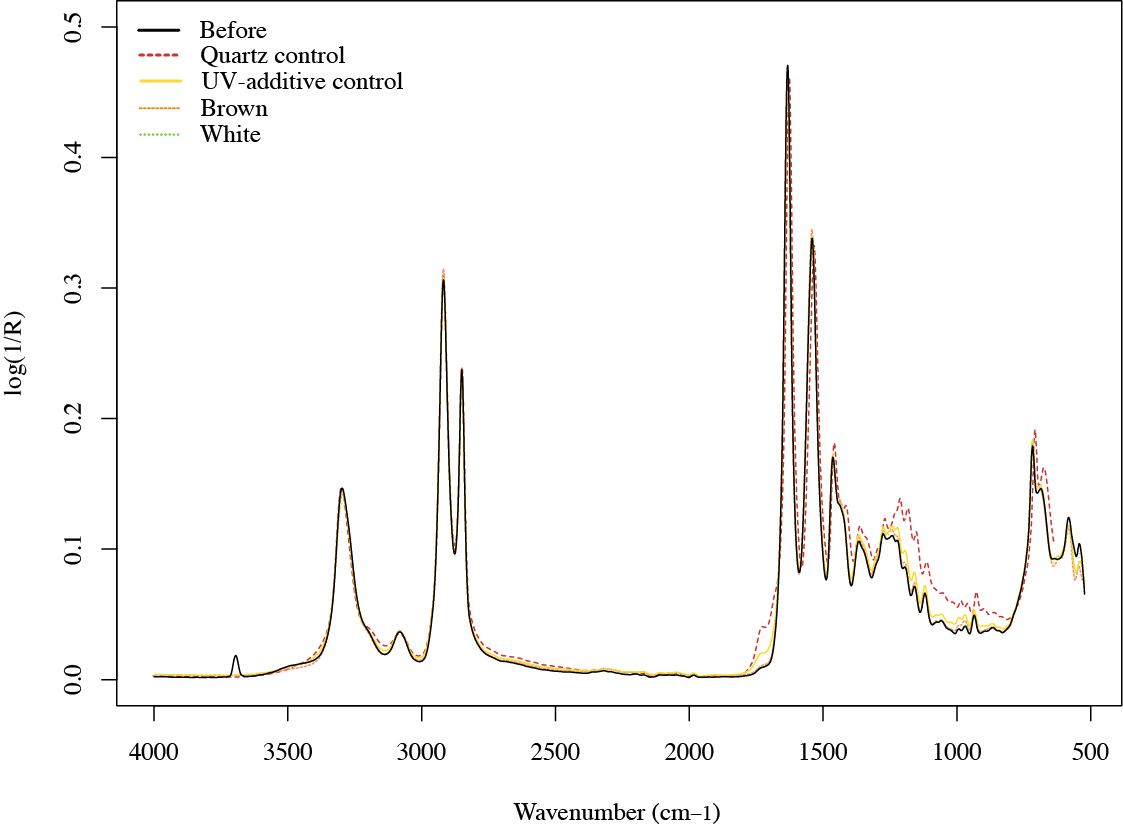


**Figure S4.** Full FTIR spectra of nylon before and after 800 h of UV exposure. Plotted lines are group mean spectra (*n* = 6) with shaded areas representing the standard error.


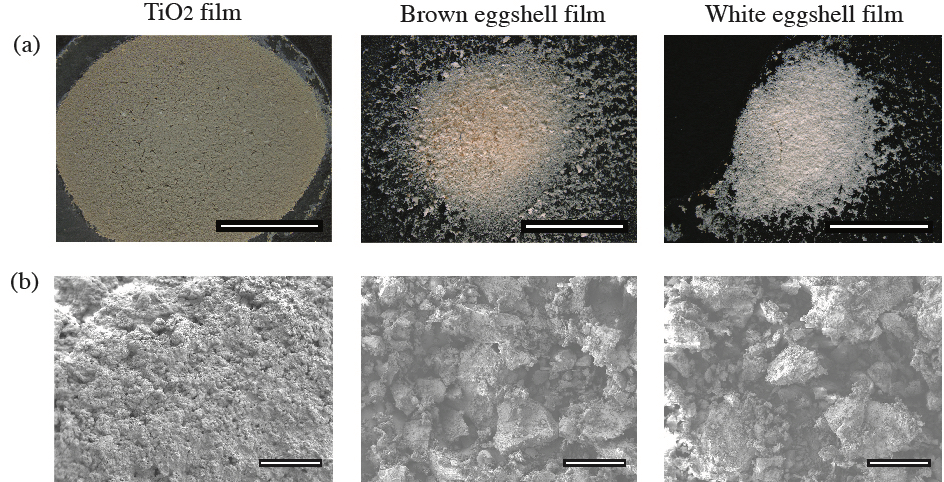


**Figure S5.** Optical (**a**) and SEM (**b**) images of suspension films of TiO2 particles, brown eggshell particles and white eggshell particles. Scale bars of optical images are 500 µm and SEM images are 100 µm.
